# Supplementary material for: Role of Nrp1 in controlling cortical inter-hemispheric circuits
Source: eLife. 2022 Mar 1;11:e69776. doi: 10.7554/eLife.69776 (PMC8887897; doi:10.7554/eLife.69776)
Supplement: Figure 2—figure supplement 1—source data 1. [file elife-69776-fig2-figsupp1-data1.xlsx]

## Sheet: Fig. 2 Sup. 1
B	Relative expression of GFP (AU)			C	Relative expression of Nrp1 (AU)
	Ipsilateral	Contralateral			Ipsilateral	Contralateral
Data 1	99.668	1		Data 1	0.761535	1
Data 2	30.3956	1		Data 2	0.830717	1
Data 3	213.468	1		Data 3	0.73409	1
	Ct
	Nrp1	GFP	Gus
Data 1.1 Ips	17.5125	24.5797	24.3548
Data 1.2 Ips	17.7034	24.4592	24.2781
Data 1.3 Ips	17.6523	24.3729	24.2435
Data 1.1 Cont	17.8162	31.5978	24.8874
Data 1.2 Cont	17.9495	31.8611	25.0466
Data 1.3 Cont	17.96	31.9068	24.9789
Data 2.1 Ips	17.4737	22.9483	24.2693
Data 2.2 Ips	17.8238	22.5662	24.2248
Data 2.3 Ips	18.0964	22.6443	24.1822
Data 2.1 Cont	18.1631	28.0569	24.6508
Data 2.2 Cont	18.0289	28.1616	24.743
Data 2.3 Cont	17.9367	28.2551	24.82
Data 3.1 Ips	17.5401	24.2813	24.1569
Data 3.2 Ips	17.687	24.2069	24.1477
Data 3.3 Ips	17.8044	24.0567	24.0732
Data 3.1 Cont	17.667	32.0853	24.6214
Data 3.2 Cont	17.6448	32.6438	24.5157
Data 3.3 Cont	17.717		24.5759
