# Supplementary material for: Role of Nrp1 in controlling cortical inter-hemispheric circuits
Source: eLife. 2022 Mar 1;11:e69776. doi: 10.7554/eLife.69776 (PMC8887897; doi:10.7554/eLife.69776)
Supplement: Figure 2—figure supplement 2—source data 1. [file elife-69776-fig2-figsupp2-data1.xlsx]

## Sheet: Fig. 2 Sup. 2
A	Contralateral innervation					B	S1/S2 column					C	S2 column					D	S2 column relative to S1/S2 column					E	S2 innervation relative to S1 innervation					F	S1 area relative to nº of ipsilateral somas
	Control	shNrp1	CAG Nrp1				Control	shNrp1	CAG Nrp1				Control	shNrp1	CAG Nrp1				Control	shNrp1	CAG Nrp1				Control	shNrp1	CAG Nrp1				Control	shNrp1	CAG Nrp1
Data 1	1.04906	0.991438	1.37331			Data 1	0.788628	0.857544	1.22688			Data 1	0.272841	0.184151	0.140834			Data 1	0.34789	0.202622	0.121796			Data 1	0.500076	0.30769	0.161033			Data 1	1.70205	0.625635	0.764206
Data 2	0.879785	2.30291	1.69872			Data 2	0.696795	2.24823	1.39233			Data 2	0.174627	0.192416	0.192301			Data 2	0.305869	0.0837835	0.140536			Data 2	0.344016	0.168307	0.197351			Data 2	0.198713	1.84681	2.09403
Data 3	0.999231	3.06443	2.31878			Data 3	0.775355	2.40861	1.83677			Data 3	0.25493	0.710781	0.057548			Data 3	0.323384	0.29308	0.0325176			Data 3	0.360289	0.352075	0.170233			Data 3	0.35082	0.846679	0.578157
Data 4	1.77624	1.47719	1.93827			Data 4	0.735783	1.09649	1.59682			Data 4	0.387985	0.411915	0.178619			Data 4	0.532004	0.375339	0.102456			Data 4	1.47909	0.601313	0.204068			Data 4	0.288072	0.444271	0.573988
Data 5	3.97001	2.06581	1.11614			Data 5	2.73693	1.55716	1.07728			Data 5	0.698345	0.398122	0.198896			Data 5	0.261092	0.296647	0.234208			Data 5	0.316785	0.540674	0.349365			Data 5	0.772848	0.839638	1.08807
Data 6	1.34962	0.638909	1.63798			Data 6	0.983569	0.518712	1.37537			Data 6	0.299184	0.072143	0.171179			Data 6	0.340968	0.139092	0.129334			Data 6	0.566975	0.199291	0.362956			Data 6	1.57246	1.23853	0.993291
Data 7	1.83536	1.72278	1.261			Data 7	1.42993	1.22873	1.61423			Data 7	0.267105	0.396759	0.126246			Data 7	0.186678	0.362083	0.119783			Data 7	0.230351	0.560818	0.241355			Data 7	1.8798	0.495193	1.18755
Data 8	1.93256	1.20131	2.33664			Data 8	1.49125	1.07972	2.10663			Data 8	0.353837	0.102379	0.233217			Data 8	0.23457	0.0951928	0.115121			Data 8	0.284859	0.138045	0.221653			Data 8	1.23523	0.874534	2.08761
		Control						shNrp1						CAG Nrp1
		N GFP L2/3	Contralateral	S1/S2 column	S2 column	Ipsilateral	S1 area	N GFP L2/3	Contralateral	S1/S2 column	S2 column	Ipsilateral	S1 area	N GFP L2/3	Contralateral	S1/S2 column	S2 column	Ipsilateral	S1 area
Brain 1	Slice 1	148	2.50941e+07	1.6137e+07	5.3414e+06	1.83731e+07	7.94926e+06	265	1.6823e+07	1.02222e+07	2.82508e+06	1.02377e+07	7.84439e+06	201	2.25218e+07	1.66429e+07	1.32079e+06	1.19847e+07	6.43087e+06
	Slice 2	102	2.21467e+07	1.5383e+07	5.61138e+06	2.20084e+07	6.05395e+06	175	8.93139e+06	6.95508e+06	896355	9.70566e+06	2.09266e+06	212	1.31656e+07	9.40556e+06	1.54469e+06	9.00896e+06	3.97926e+06
Brain 2	Slice 1	318	3.21304e+07	2.60866e+07	4.81882e+06	2.57112e+07	1.28627e+06	264	5.00539e+07	4.39999e+07	4.34959e+06	1.7481e+07	1.91455e+07	217	2.51425e+07	1.62783e+07	2.67037e+06	1.51098e+07	9.15597e+06
	Slice 2	170	2.56219e+07	1.76558e+07	7.53929e+06	4.65868e+07	1.55638e+06	222	3.77845e+07	3.38593e+07	2.32655e+06	1.71053e+07	1.11352e+07	173	4.27521e+07	2.92921e+07	3.42797e+06	1.64908e+07	1.67652e+07
Brain 3	Slice 1	224	1.46759e+07	1.12046e+07	2.78375e+06	1.55748e+07	1.55998e+06	156	3.68592e+07	2.63936e+07	8.18065e+06	9.78626e+06	5.32574e+06	297	1.80724e+07	2.59113e+07	904441	1.81154e+07	3.80134e+06
	Slice 2	110	1.68029e+07	1.09318e+07	4.35435e+06	1.31501e+07	1.7974e+06	187	2.65104e+07	2.00846e+07	5.54762e+06	9.47289e+06	4.13339e+06	299	2.53945e+07	3.11988e+07	940017	1.44242e+07	7.65635e+06
Brain 4	Slice 1	280	3.51503e+07	2.15409e+07	1.18577e+07	3.92549e+07	2.37727e+06	177	1.34578e+07	9.26418e+06	3.44995e+06	9.50443e+06	2.1351e+06	163	1.70861e+07	1.31456e+07	1.53351e+06	7.82987e+06	4.58356e+06
	Slice 2	177	4.11084e+07	2.64737e+07	1.35952e+07	2.86878e+07	1.8843e+06	143	1.50217e+07	9.8418e+06	3.72298e+06	8.07856e+06	2.49524e+06	186	1.55922e+07	1.34283e+07	1.18514e+06	7.34356e+06	1.86162e+06
Brain 5	Slice 1	219	4.44292e+07	4.1459e+07	8.79229e+06	1.35121e+07	4.89838e+06	108	3.16656e+07	2.45619e+07	3.61174e+06	1.23821e+07	2.71611e+06	299	1.62495e+07	8.80582e+06	2.17544e+06	2.11988e+07	6.50236e+06
	Slice 2	178	3.07334e+07	3.01679e+07	9.35543e+06	1.25409e+07	5.15692e+06	117	2.87923e+07	1.63202e+07	7.28284e+06	1.44342e+07	3.58325e+06	145	2.16789e+07	1.31924e+07	2.92041e+06	9.89392e+06	7.32704e+06
Brain 6	Slice 1	218	6.90389e+07	4.55328e+07	1.1891e+07	3.16888e+07	1.21745e+07	217	3.35669e+07	2.10462e+07	2.92626e+06	3.37441e+07	8.44083e+06	166	1.4419e+07	1.59479e+07	2.40823e+06	1.27796e+07	4.64985e+06
	Slice 2	154	4.17397e+07	2.26097e+07	9.51381e+06	4.26386e+07	7.48571e+06	194	2.54997e+07	1.47773e+07	2.05618e+06	3.5718e+07	8.41472e+06	109	1.57883e+07	1.8252e+07	1.96506e+06	1.27671e+07	4.13884e+06
Brain 7	Slice 1	134	6.00214e+07	3.99284e+07	7.48921e+06	2.46326e+07	1.04674e+07	203	4.14196e+07	3.00238e+07	7.19082e+06	1.85161e+07	3.27764e+06	239	4.19061e+07	3.02951e+07	3.11978e+06	2.77933e+07	7.99065e+06
	Slice 2	143	5.08344e+07	3.29227e+07	6.11669e+06	2.65743e+07	6.68615e+06	164	3.08798e+07	1.96512e+07	9.52422e+06	2.35072e+07	2.74676e+06	205	4.41232e+07	3.03278e+07	4.14237e+06	2.95371e+07	9.31784e+06
Brain 8	Slice 1	234	7.09504e+07	4.94412e+07	9.23956e+06	3.51479e+07	1.12977e+07	170	2.84412e+07	2.07294e+07	2.09545e+06	2.04949e+07	6.11854e+06	164	7.08085e+07	5.17091e+07	6.80378e+06	2.18701e+07	1.37403e+07
	Slice 2	176	5.96589e+07	4.23617e+07	1.1957e+07	2.68819e+07	5.94401e+06	157	4.2137e+07	3.64616e+07	3.25601e+06	3.17609e+07	3.47e+06	177	6.58286e+07	4.66401e+07	4.60169e+06	2.96245e+07	9.7161e+06
