# Supplementary material for: Role of Nrp1 in controlling cortical inter-hemispheric circuits
Source: eLife. 2022 Mar 1;11:e69776. doi: 10.7554/eLife.69776 (PMC8887897; doi:10.7554/eLife.69776)
Supplement: Figure 2—figure supplement 3—source data 1. [file elife-69776-fig2-figsupp3-data1.xlsx]

## Sheet: Fig. 2 Sup. 3
D	Ipsilateral electroporated L2/3 neurons				E	Layer distribution of GFP+ (%)								F	% L2/3 GFP+ at P30
															S1			S2
	Control	shNrp1	CAG Nrp1				L1	L2/3	L4	L5A	L5B	L6			Control	shNrp1	CAG Nrp1	Control	shNrp1	CAG Nrp1
Data 1	250	440	413		Control	Data 1	1.63934	90.1693	8.19136	0	0	0		Data 1	36	100	93.2203	64	0	6.77966
Data 2	488	486	390			Data 2	1.00865	84.9918	13.9995	0	0	0		Data 2	53.6885	82.716	83.8462	46.3115	17.284	16.1538
Data 3	334	343	596			Data 3	3.27273	79.0909	17.6364	0	0	0		Data 3	80.8383	15.1603	72.1477	19.1617	84.8397	27.8523
Data 4	457	320	349			Data 4	0.765306	87.836	10.9414	0	0.457317	0		Data 4	49.0153	31.875	80.2292	50.9847	68.125	19.7708
Data 5	397	225	444			Data 5	0.225225	78.9199	20.6776	0	0.177305	0		Data 5	42.8212	50.2222	76.5766	57.1788	49.7778	23.4234
Data 6	372	411	275			Data 6	4.07928	92.6854	3.23529	0	0	0		Data 6	60.4839	72.0195	49.8182	39.5161	27.9805	50.1818
Data 7	277	367	444			Data 7	6.93711	89.805	3.25786	0	0	0		Data 7	54.5126	66.7575	35.3604	45.4874	33.2425	64.6396
Data 8	410	327	341			Data 8	5.25362	91.5533	3.19306	0	0	0		Data 8	60.2439	63.9144	31.9648	39.7561	36.0856	68.0352
					shNrp1	Data 1	0.759878	81.1614	18.0787	0	0	0
						Data 2	3.76839	84.0716	12.16	0	0	0
						Data 3	0.248756	91.0888	8.6624	0	0	0
						Data 4	5.34858	85.5643	9.0871	0	0	0
						Data 5	0	90.8699	9.13009	0	0	0
						Data 6	3.50413	94.6349	1.86094	0	0	0
						Data 7	7.40769	91.6402	0.446429	0.5057	0	0
						Data 8	2.13904	87.6775	9.91605	0.26738	0	0
					CAG Nrp1	Data 1	2.10059	86.4582	11.4412	0	0	0
						Data 2	0.207469	94.4493	5.13574	0.207469	0	0
						Data 3	0.257069	77.1038	22.12	0.258743	0.130208	0.130208
						Data 4	2.68301	84.833	12.484	0	0	0
						Data 5	0	85.9804	13.5806	0.439045	0	0
						Data 6	1.93026	90.342	7.72778	0	0	0
						Data 7	6.15344	89.5457	4.1143	0.186567	0	0
						Data 8	4.46694	93.3378	2.19523	0	0	0
		Control						shNrp1						CAG-Nrp1
		L1	L2/3	L4	L5A	L5B	L6	L1	L2/3	L4	L5A	L5B	L6	L1	L2/3	L4	L5A	L5B	L6
Brain 1	Slice 1	0	148	5	0	0	0	5	265	59	0	0	0	5	201	5	0	0	0
	Slice 2	4	102	16	0	0	0	0	175	39	0	0	0	5	212	56	0	0	0
Brain 2	Slice 1	7	318	22	0	0	0	13	264	42	0	0	0	1	217	22	1	0	0
	Slice 2	0	170	47	0	0	0	9	222	29	0	0	0	0	173	2	0	0	0
Brain 3	Slice 1	12	224	28	0	0	0	0	156	19	0	0	0	0	297	84	1	1	1
	Slice 2	3	110	37	0	0	0	1	187	13	0	0	0	2	299	87	1	0	0
Brain 4	Slice 1	0	280	45	0	3	0	19	177	3	0	0	0	6	163	32	0	0	0
	Slice 2	3	177	16	0	0	0	2	143	29	0	0	0	5	186	19	0	0	0
Brain 5	Slice 1	0	219	62	0	1	0	0	108	8	0	0	0	0	299	45	1	0	0
	Slice 2	1	178	43	0	0	0	0	117	15	0	0	0	0	145	24	1	0	0
Brain 6	Slice 1	12	218	0	0	0	0	2	217	2	0	0	0	4	166	5	0	0	0
	Slice 2	5	154	11	0	0	0	13	194	6	0	0	0	2	109	16	0	0	0
Brain 7	Slice 1	21	134	4	0	0	0	18	203	2	1	0	0	13	239	15	1	0	0
	Slice 2	1	143	6	0	0	0	12	164	0	1	0	0	17	205	6	0	0	0
Brain 8	Slice 1	29	234	13	0	0	0	0	170	16	0	0	0	3	164	4	0	0	0
	Slice 2	0	176	3	0	0	0	8	157	21	1	0	0	14	177	4	0	0	0
		Control		shNrp1		CAG-Nrp1
		S1L2/3	S2L2/3	S1L2/3	S2L2/3	S1L2/3	S2L2/3
Brain 1	Slice 1	50	98	265	0	195	6
	Slice 2	40	62	175	0	190	22
Brain 2	Slice 1	204	114	232	32	164	53
	Slice 2	58	112	170	52	163	10
Brain 3	Slice 1	178	46	20	136	270	27
	Slice 2	92	18	32	155	160	139
Brain 4	Slice 1	111	169	65	112	115	48
	Slice 2	113	64	37	106	165	21
Brain 5	Slice 1	69	150	65	43	228	71
	Slice 2	101	77	48	69	112	33
Brain 6	Slice 1	155	63	145	72	99	67
	Slice 2	70	84	151	43	38	71
Brain 7	Slice 1	74	60	159	44	84	155
	Slice 2	77	66	86	78	73	132
Brain 8	Slice 1	168	66	112	58	48	116
	Slice 2	79	97	97	60	61	116
