# Supplementary material for: Role of Nrp1 in controlling cortical inter-hemispheric circuits
Source: eLife. 2022 Mar 1;11:e69776. doi: 10.7554/eLife.69776 (PMC8887897; doi:10.7554/eLife.69776)
Supplement: Figure 2—source data 1. [file elife-69776-fig2-data1.xlsx]

## Sheet: Figure 2
F	Contralateral innervation relative to ipsilateral somas				G	S1/S2 column relative to ipsilateral somas				H	S2 column relative to ipsilateral somas
	Control	shNrp1	CAG Nrp1			Control	shNrp1	CAG Nrp1			Control	shNrp1	CAG Nrp1
Data 1	0.853754	0.252849	0.384508		Data 1	0.826129	0.248994	0.404296		Data 1	0.989061	0.171343	0.150441
Data 2	0.555854	0.794402	0.80144		Data 2	0.590999	1.01478	0.776805		Data 2	0.64598	0.292641	0.348715
Data 3	0.481922	0.834685	0.321872		Data 3	0.474984	0.879369	0.609109		Data 3	0.564668	0.89138	0.0671916
Data 4	0.789963	0.399807	0.416525		Data 4	0.720109	0.385213	0.48593		Data 4	1.29363	0.494249	0.171311
Data 5	0.829141	1.1907	0.450094		Data 5	1.1407	1.16652	0.38289		Data 5	1.00645	1.03883	0.297644
Data 6	1.29765	0.631744	0.51159		Data 6	1.13081	0.550521	0.837808		Data 6	1.26285	0.261464	0.353218
Data 7	1.77385	0.866226	0.862352		Data 7	1.6793	0.851172	0.873343		Data 7	1.07113	1.01504	0.361085
Data 8	1.41787	0.961962	1.77443		Data 8	1.43696	1.12603	1.84017		Data 8	1.16622	0.358968	0.73264
		Control				shNrp1				CAG Nrp1
		N GFP L2/3	Contralateral	S1/S2 column	S2 column	N GFP L2/3	Contralateral	S1/S2 column	S2 column	N GFP L2/3	Contralateral	S1/S2 column	S2 column
Brain 1	Slice 1	148	2.50941e+07	1.6137e+07	5.3414e+06	265	1.6823e+07	1.02222e+07	2.82508e+06	201	2.25218e+07	1.66429e+07	1.32079e+06
	Slice 2	102	2.21467e+07	1.5383e+07	5.61138e+06	175	8.93139e+06	6.95508e+06	896355	212	1.31656e+07	9.40556e+06	1.54469e+06
Brain 2	Slice 1	318	3.21304e+07	2.60866e+07	4.81882e+06	264	5.00539e+07	4.39999e+07	4.34959e+06	217	2.51425e+07	1.62783e+07	2.67037e+06
	Slice 2	170	2.56219e+07	1.76558e+07	7.53929e+06	222	3.77845e+07	3.38593e+07	2.32655e+06	173	4.27521e+07	2.92921e+07	3.42797e+06
Brain 3	Slice 1	224	1.46759e+07	1.12046e+07	2.78375e+06	156	3.68592e+07	2.63936e+07	8.18065e+06	297	1.80724e+07	2.59113e+07	904441
	Slice 2	110	1.68029e+07	1.09318e+07	4.35435e+06	187	2.65104e+07	2.00846e+07	5.54762e+06	299	2.53945e+07	3.11988e+07	940017
Brain 4	Slice 1	280	3.51503e+07	2.15409e+07	1.18577e+07	177	1.34578e+07	9.26418e+06	3.44995e+06	163	1.70861e+07	1.31456e+07	1.53351e+06
	Slice 2	177	4.11084e+07	2.64737e+07	1.35952e+07	143	1.50217e+07	9.8418e+06	3.72298e+06	186	1.55922e+07	1.34283e+07	1.18514e+06
Brain 5	Slice 1	219	4.44292e+07	4.1459e+07	8.79229e+06	108	3.16656e+07	2.45619e+07	3.61174e+06	299	1.62495e+07	8.80582e+06	2.17544e+06
	Slice 2	178	3.07334e+07	3.01679e+07	9.35543e+06	117	2.87923e+07	1.63202e+07	7.28284e+06	145	2.16789e+07	1.31924e+07	2.92041e+06
Brain 6	Slice 1	218	6.90389e+07	4.55328e+07	1.1891e+07	217	3.35669e+07	2.10462e+07	2.92626e+06	166	1.4419e+07	1.59479e+07	2.40823e+06
	Slice 2	154	4.17397e+07	2.26097e+07	9.51381e+06	194	2.54997e+07	1.47773e+07	2.05618e+06	109	1.57883e+07	1.8252e+07	1.96506e+06
Brain 7	Slice 1	134	6.00214e+07	3.99284e+07	7.48921e+06	203	4.14196e+07	3.00238e+07	7.19082e+06	239	4.19061e+07	3.02951e+07	3.11978e+06
	Slice 2	143	5.08344e+07	3.29227e+07	6.11669e+06	164	3.08798e+07	1.96512e+07	9.52422e+06	205	4.41232e+07	3.03278e+07	4.14237e+06
Brain 8	Slice 1	234	7.09504e+07	4.94412e+07	9.23956e+06	170	2.84412e+07	2.07294e+07	2.09545e+06	164	7.08085e+07	5.17091e+07	6.80378e+06
	Slice 2	176	5.96589e+07	4.23617e+07	1.1957e+07	157	4.2137e+07	3.64616e+07	3.25601e+06	177	6.58286e+07	4.66401e+07	4.60169e+06
