# Supplementary material for: Role of Nrp1 in controlling cortical inter-hemispheric circuits
Source: eLife. 2022 Mar 1;11:e69776. doi: 10.7554/eLife.69776 (PMC8887897; doi:10.7554/eLife.69776)
Supplement: Figure 3—figure supplement 3—source data 1. [file elife-69776-fig3-figsupp3-data1.xlsx]

## Sheet: Fg. 3 Sup. 3
B	Location of CPNs from injections in S1/S2 column				C	Location of CPNs from injections in S2 column
	Control	shNrp1	CAG Nrp1			Control	shNrp1	CAG Nrp1
Data 1	1.48958	1.45238	1.87719		Data 1	2.35924	2.77778	2.18165
Data 2	1.51464	1.07432	1.10065		Data 2	3.81418	3.00529	1.94992
Data 3	1.90542	1.08333	1.3875		Data 3	3.33497	2.68158	2.63254
Data 4	2.07773				Data 4		2.16615	1.72269
		S1/S2 injections										S2 injections
		Control		shNrp1		CAG-Nrp1						Control				shNrp1				CAG-Nrp1
		S1	S2	S1	S2	S1	S2					S1	S2			S1	S2			S1	S2
Brain 1	Slice 1	71	48	68	51	67	34			Brain 1	Slice 1	23	70	Brain 1	Slice 1	16	40	Brain 1	Slice 1	9	20
	Slice 2	51	34	66	42	66	37				Slice 2	40	67		Slice 2	18	55		Slice 2	22	50
Brain 2	Slice 1	105	46	15	10	26	28			Brain 2	Slice 1	24	78	Brain 2	Slice 1	21	64		Slice 3	20	41
	Slice 2	56	75	24	37	28	22				Slice 2	7	33		Slice 2	27	80	Brain 2	Slice 1	46	103
Brain 3	Slice 1	192	81	14	12	22	16				Slice 3	23	80	Brain 3	Slice 1	19	43		Slice 2	56	93
	Slice 2	121	84	17	17	21	15			Brain 3	Slice 1	12	35		Slice 2	20	62	Brain 3	Slice 1	35	89
Brain 4	Slice 1	64	68								Slice 2	17	78	Brain 4	Slice 1	25	46		Slice 2	36	98
	Slice 2	45	14								Slice 3	30	75		Slice 2	23	40	Brain 4	Slice 1	7	13
															Slice 3	26	86		Slice 2	17	27
															Slice 4	36	64
