# Supplementary material for: Role of Nrp1 in controlling cortical inter-hemispheric circuits
Source: eLife. 2022 Mar 1;11:e69776. doi: 10.7554/eLife.69776 (PMC8887897; doi:10.7554/eLife.69776)
Supplement: Figure 3—source data 1. [file elife-69776-fig3-data1.xlsx]

## Sheet: Figure 3
J	Injections in S1/S2 column					K	Injections in S2 column
	Control	shNrp1	CAG Nrp1				Control	shNrp1	CAG Nrp1
Data 1	1.72727	1.09091	1.76			Data 1	1.8	1.12903	1.59259
Data 2	1.41667	1.61111	1.09091			Data 2	2.625	1.44444	1.34483
Data 3	1.77419	1.07692	0.894737			Data 3	2.3125	0.914286	1.51429
Data 4	1.35714					Data 4		1.94286	1.25
		S1/S2 injections										S2 injections
		Control		shNrp1		CAG-Nrp1						Control				shNrp1				CAG-Nrp1
		S1	S2	S1	S2	S1	S2					S1	S2			S1	S2			S1	S2
Brain 1	Slice 1	24	15	23	22	27	13			Brain 1	Slice 1	14	26	Brain 1	Slice 1	15	17	Brain 1	Slice 1	8	11
	Slice 2	33	18	25	22	17	12				Slice 2	16	28		Slice 2	16	18		Slice 2	14	18
Brain 2	Slice 1	29	14	14	9	10	13			Brain 2	Slice 1	9	21	Brain 2	Slice 1	14	18		Slice 3	13	25
	Slice 2	22	22	15	9	14	9				Slice 2	6	14		Slice 2	13	21	Brain 2	Slice 1	13	16
Brain 3	Slice 1	27	15	9	9	16	16				Slice 3	9	28	Brain 3	Slice 1	16	11		Slice 2	16	23
	Slice 2	28	16	10	8	11	13			Brain 3	Slice 1	11	27		Slice 2	19	21	Brain 3	Slice 1	17	23
Brain 4	Slice 1	27	20								Slice 2	6	17	Brain 4	Slice 1	9	16		Slice 2	18	30
	Slice 2	11	8								Slice 3	15	30		Slice 2	11	17	Brain 4	Slice 1	11	13
															Slice 3	8	20		Slice 2	17	22
															Slice 4	7	15
