# Supplementary material for: Role of Nrp1 in controlling cortical inter-hemispheric circuits
Source: eLife. 2022 Mar 1;11:e69776. doi: 10.7554/eLife.69776 (PMC8887897; doi:10.7554/eLife.69776)
Supplement: Figure 4—figure supplement 1—source data 1. [file elife-69776-fig4-figsupp1-data1.xlsx]

## Sheet: Fig. 4 Sup. 1
A	Ipsilateral electroporated L2/3 neurons (P10)				B	Layer distribution of GFP+ (%) (P10)								C	% L2/3 GFP+ at P10							H	Coordenates from Bregma (P10)					I	Coordenates from Bregma (P16)					J	Coordenates from Bregma (P30)
															S1			S2
	Control	shNrp1	CAG Nrp1				L1	L2/3	L4	L5A	L5B	L6			Control	shNrp1	CAG Nrp1	Control	shNrp1	CAG Nrp1				Control	shNrp1	CAG Nrp1				Control	shNrp1	CAG Nrp1				Control	shNrp1	CAG Nrp1
Data 1	438	511	332		Control	Data 1	7.03968	84.4055	8.55481	0	0	0		Data 1	69.7778	32.0939	68.6747	30.2222	67.9061	31.3253		Brain 1	Slice 1	-0.94	-1.46	-1.34		Brain 1	Slice 1	-0.94	-1.22	-1.06		Brain 1	Slice 1	-0.94	-1.06	-0.94
Data 2	319	556	443			Data 2	2.86315	87.464	9.67287	0	0	0		Data 2	70.9184	54.8561	59.5937	29.0816	45.1439	40.4063			Slice 2	-1.34	-1.34	-0.94			Slice 2	-1.06	-0.94	-1.34			Slice 2	-1.06	-1.22	-1.06
Data 3	458	317	481			Data 3	0.458716	87.6177	11.9235	0	0	0		Data 3	61.1354	70.0315	58.0042	38.8646	29.9685	41.9958		Brain 2	Slice 1	-0.94	-1.58	-1.46		Brain 2	Slice 1	-1.22	-1.22	-0.82		Brain 2	Slice 1	-0.82	-0.94	-0.94
Data 4	357	412				Data 4	0.537634	86.0743	13.388	0	0	0		Data 4	75.6345	57.6503		24.3655	42.3497				Slice 2	-1.06	-1.22	-1.22			Slice 2	-1.46	-1.34	-1.22			Slice 2	-1.06	-1.06	-1.06
					shNrp1	Data 1	7.77677	81.215	8.2315	1.22101	0.191571	1.36419										Brain 3	Slice 1	-1.46	-1.06	-1.46		Brain 3	Slice 1	-1.06	-1.34	-1.06		Brain 3	Slice 1	-0.82	-1.34	-0.94
						Data 2	5.57398	79.5388	13.3068	0.574713	0	1.00575											Slice 2	-1.58	-1.22	-1.34			Slice 2	-1.22	-1.46	-1.46			Slice 2	-1.06	-1.46	-1.06
						Data 3	4.96703	73.011	18.5604	0.576923	0.769231	2.11538										Brain 4	Slice 1	-1.34	-1.34			Brain 4	Slice 1	-1.06	-1.34	-1.34		Brain 4	Slice 1	-1.22	-0.94	-1.06
						Data 4	8.40139	70.6441	14.5688	1.7944	0.497427	4.09389											Slice 2	-1.06	-0.94				Slice 2	-1.46	-1.46	-1.46			Slice 2	-1.34	-1.06	-1.34
					CAG Nrp1	Data 1	3.10315	88.6364	8.26049	0	0	0																Brain 5	Slice 1	-0.94	-1.22	-0.94		Brain 5	Slice 1	-1.06	-1.22	-0.94
						Data 2	1.42598	84.7311	13.8429	0	0	0																	Slice 2	-1.06	-1.34	-1.06			Slice 2	-1.22	-1.34	-1.06
						Data 3	1.4607	86.7468	11.7925	0	0	0																Brain 6	Slice 1			-1.34		Brain 6	Slice 1	-1.22	-0.94	-1.06
																													Slice 2			-1.46			Slice 2	-1.46	-1.22	-1.34
																																		Brain 7	Slice 1	-1.34	-1.06	-1.34
D	Ipsilateral electroporated L2/3 neurons (P16)				E	Layer distribution of GFP+ (%) (P16)								F	% L2/3 GFP+ at P16																				Slice 2	-1.46	-1.22	-1.46
															S1			S2																Brain 8	Slice 1	-1.34	-1.34	-1.34
	Control	shNrp1	CAG Nrp1				L1	L2/3	L4	L5A	L5B	L6			Control	shNrp1	CAG Nrp1	Control	shNrp1	CAG Nrp1															Slice 2	-1.46	-1.46	-1.46
Data 1	349	553	645		Control	Data 1	0	84.2495	15.7505	0	0	0		Data 1	70.2006	61.6637	81.7054	29.7994	38.3363	18.2946														Brain 9	Slice 1	-0.94	-1.34
Data 2	152	227	493			Data 2	1.65459	83.4783	14.8671	0	0	0		Data 2	55.2632	70.4846	79.716	44.7368	29.5154	20.284															Slice 2	-1.06	-1.46
Data 3	293	288	211			Data 3	0	77.3661	22.6339	0	0	0		Data 3	98.6348	67.7083	80.5687	1.36519	32.2917	19.4313
Data 4	463	540	616			Data 4	0.816327	85.8469	12.9286	0.204082	0	0.204082		Data 4	75.8442	69.4444	67.5325	24.1558	30.5556	32.4675
					shNrp1	Data 1	0.2849	77.8383	21.8768	0	0	0
						Data 2	0.326797	65.6199	34.0533	0	0	0
						Data 3	0	87.4871	12.5129	0	0	0
						Data 4	0	97.5674	2.26864	0.163934	0	0
					CAG Nrp1	Data 1	1.24153	85.1193	13.1877	0.225734	0.112867	0.112867
						Data 2	0	79.4486	20.5514	0	0	0
						Data 3	0.406504	93.4288	6.16465	0	0	0
						Data 4	0	96.4815	2.28633	0.317601	0	0.914531
P10		Control						shNrp1						CAG-Nrp1
		L1	L2/3	L4	L5A	L5B	L6	L1	L2/3	L4	L5A	L5B	L6	L1	L2/3	L4	L5A	L5B	L6
Brain 1	Slice 1	37	221	31	0	0	0	46	278	48	2	0	6	15	232	39	0	0	0
	Slice 2	3	217	15	0	0	0	9	233	10	5	1	3	1	100	3	0	0	0
Brain 2	Slice 1	8	156	6	0	0	0	24	282	45	0	0	0	3	266	39	0	0	0
	Slice 2	2	163	31	0	0	0	15	274	48	4	0	7	4	177	32	0	0	0
Brain 3	Slice 1	2	180	36	0	0	0	12	129	34	0	0	0	8	280	33	0	0	0
	Slice 2	0	278	22	0	0	0	8	188	46	3	4	11	1	201	31	0	0	0
Brain 4	Slice 1	0	196	33	0	0	0	22	222	68	8	2	9
	Slice 2	2	161	23	0	0	0	26	190	22	3	1	14
P16		Control						shNrp1						CAG-Nrp1
		L1	L2/3	L4	L5A	L5B	L6	L1	L2/3	L4	L5A	L5B	L6	L1	L2/3	L4	L5A	L5B	L6
Brain 1	Slice 1	0	219	35	0	0	0	2	290	59	0	0	0	11	416	12	2	1	1
	Slice 2	0	130	28	0	0	0	0	263	97	0	0	0	0	229	71	0	0	0
Brain 2	Slice 1	2	72	16	0	0	0	0	129	63	0	0	0	0	336	30	0	0	0
	Slice 2	1	80	11	0	0	0	1	98	54	0	0	0	0	157	77	0	0	0
Brain 3	Slice 1	0	143	56	0	0	0	0	137	23	0	0	0	0	97	6	0	0	0
	Slice 2	0	150	31	0	0	0	0	151	18	0	0	0	1	114	8	0	0	0
Brain 4	Slice 1	0	231	69	0	0	0	0	300	4	1	0	0	0	273	5	1	0	2
	Slice 2	4	232	7	1	0	1	0	240	8	0	0	0	0	343	10	1	0	4
P10		Control		shNrp1		CAG-Nrp1				P16		Control		shNrp1		CAG-Nrp1
		S1L2/3	S2L2/3	S1L2/3	S2L2/3	S1L2/3	S2L2/3					S1L2/3	S2L2/3	S1L2/3	S2L2/3	S1L2/3	S2L2/3
Brain 1	Slice 1	146	75	81	197	142	90			Brain 1	Slice 1	159	60	179	111	377	39
	Slice 2	168	61	83	150	86	14				Slice 2	86	44	162	101	150	79
Brain 2	Slice 1	149	71	91	191	118	148			Brain 2	Slice 1	42	30	92	37	252	84
	Slice 2	129	43	214	60	146	31				Slice 2	42	38	68	30	141	16
Brain 3	Slice 1	111	69	86	43	132	148			Brain 3	Slice 1	139	4	85	52	75	22
	Slice 2	169	109	136	52	147	54				Slice 2	150	0	110	41	95	19
Brain 4	Slice 1	139	76	105	71					Brain 4	Slice 1	92	61	237	63	203	70
	Slice 2	159	20	106	84						Slice 2	200	32	138	102	213	130
