# Supplementary material for: Role of Nrp1 in controlling cortical inter-hemispheric circuits
Source: eLife. 2022 Mar 1;11:e69776. doi: 10.7554/eLife.69776 (PMC8887897; doi:10.7554/eLife.69776)
Supplement: Figure 4—figure supplement 2—source data 1. — Raw data of measurements. [file elife-69776-fig4-figsupp2-data1.xlsx]

## Sheet: Fig. 4 Sup. 2
A	Contralateral Innervation							B	S1/S2 column
	P10			P16					P10			P16
	Control	shNrp1	CAG Nrp1	Control	shNrp1	CAG Nrp1			Control	shNrp1	CAG Nrp1	Control	shNrp1	CAG Nrp1
Data 1	0.659	0.399	0.646	1.50333	0.609053	0.405063		Data 1	0.599	0.388	0.756	1.74178	0.765202	0.382405
Data 2	0.868	0.61	0.658	1.7691	0.790743	0.498976		Data 2	0.661	0.763	0.662	1.93003	0.895558	0.527944
Data 3	1.03	0.911	0.585	0.995571	1.0215	0.620892		Data 3	1.158	1.116	0.634	0.829282	1.22768	0.669862
Data 4	1.443	0.989		1.29925	0.296147	0.660975		Data 4	1.582	0.989		1.45764	0.287411	0.83987
C	S2 column							D	S2 column relative to S1/S2 column
	P10			P16					P10			P16
	Control	shNrp1	CAG Nrp1	Control	shNrp1	CAG Nrp1			Control	shNrp1	CAG Nrp1	Control	shNrp1	CAG Nrp1
Data 1	0.826	1.287	0.885	5.14561	0.889929	0.668002		Data 1	0.127297	0.306	0.143	0.277175	0.116	0.152
Data 2	0.861	1.108	2.264	4.82651	1.36979	1.32343		Data 2	0.144159	0.144	0.319	0.232609	0.158	0.262
Data 3	1.235	1.515	0.875	3.7303	1.6571	1.25708		Data 3	0.120263	0.13	0.128	0.410987	0.124	0.186
Data 4	1.078	2.694		5.48864	0.812134	1.77292		Data 4	0.0674051	0.255		0.355292	0.262	0.2
E	S2 innervation relative to S1 innervation							F	S1 area
	P10			P16					P10			P16
	Control	shNrp1	CAG Nrp1	Control	shNrp1	CAG Nrp1			Control	shNrp1	CAG Nrp1	Control	shNrp1	CAG Nrp1
Data 1	0.203232	0.291	0.204	0.344638	0.304	0.14		Data 1	0.499	0.453	0.677	1.14009	0.503081	0.45186
Data 2	0.168925	0.188	0.362	0.272146	0.373	0.43		Data 2	0.899	0.589	0.442	1.06169	0.81524	0.361842
Data 3	0.19316	0.191	0.191	0.629201	0.387	0.314		Data 3	0.939	0.842	0.708	1.02078	0.633971	0.37703
Data 4	0.116918	0.34		0.425148	0.417	0.447		Data 4	1.663	0.966		0.306957	0.266729	0.175458
P10		Control					shNrp1					CAG Nrp1
		N GFP L2/3	Contralateral	S1/S2 column	S2 column	S1 area	N GFP L2/3	Contralateral	S1/S2 column	S2 column	S1 area	N GFP L2/3	Contralateral	S1/S2 column	S2 column	S1 area
Brain 1	Slice 1	221	4.80792e+07	2.237e+07	2.99728e+06	1.08585e+07	278	2.26892e+07	1.41897e+07	3.03193e+06	9.45183e+06	232	2.03137e+07	1.26852e+07	2.72506e+06	5.81493e+06
	Slice 2	217	2.10544e+07	1.37936e+07	1.66361e+06	1.16113e+07	233	2.53836e+07	1.29716e+07	5.16934e+06	1.37972e+07	100	2.21115e+07	1.53024e+07	1.10142e+06	1.14322e+07
Brain 2	Slice 1	156	4.30768e+07	1.93966e+07	1.62588e+06	1.54514e+07	282	4.09797e+07	2.7137e+07	6.73017e+06	7.97308e+06	266	3.50693e+07	2.40061e+07	4.36415e+06	1.4008e+07
	Slice 2	163	2.25907e+07	9.33835e+06	1.90965e+06	1.40371e+07	274	4.00523e+07	3.1129e+07	1.27066e+06	2.54681e+07	177	3.23317e+07	1.62439e+07	7.40229e+06	6.80249e+06
Brain 3	Slice 1	180	6.52165e+07	4.10726e+07	3.00658e+06	2.2293e+07	129	3.3103e+07	2.48251e+07	2.93724e+06	1.06995e+07	280	3.46742e+07	2.39827e+07	1.96304e+06	1.57166e+07
	Slice 2	278	3.60968e+07	2.50255e+07	4.18738e+06	1.93338e+07	188	3.35883e+07	2.15149e+07	3.04599e+06	1.70055e+07	201	3.13072e+07	1.78368e+07	3.11575e+06	1.80338e+07
Brain 4	Slice 1	196	5.56168e+07	3.21236e+07	2.64062e+06	1.94028e+07	222	4.65033e+07	2.38983e+07	9.67109e+06	1.04908e+07
	Slice 2	161	6.52416e+07	4.36349e+07	2.29556e+06	3.91648e+07	190	3.95075e+07	2.58531e+07	2.72024e+06	2.64757e+07
P16		Control					shNrp1					CAG Nrp1
		N GFP L2/3	Contralateral	S1/S2 column	S2 column	S1 area	N GFP L2/3	Contralateral	S1/S2 column	S2 column	S1 area	N GFP L2/3	Contralateral	S1/S2 column	S2 column	S1 area
Brain 1	Slice 1	219	7.20976e+07	5.28421e+07	9.29385e+06	3.11557e+07	290	3.98742e+07	3.46093e+07	2.1948e+06	1.26701e+07	416	3.11782e+07	1.63938e+07	1.77028e+06	1.41605e+07
	Slice 2	130	5.05432e+07	3.08747e+07	1.16852e+07	1.20173e+07	263	4.03427e+07	2.39328e+07	4.02836e+06	1.57475e+07	229	2.71401e+07	1.50473e+07	2.9593e+06	1.35069e+07
Brain 2	Slice 1	72	3.5264e+07	2.06796e+07	5.1452e+06	1.09849e+07	129	3.40202e+07	2.35535e+07	2.99257e+06	1.50792e+07	336	4.89746e+07	3.08787e+07	4.9416e+06	1.86929e+07
	Slice 2	80	2.84131e+07	1.94653e+07	4.21252e+06	5.27955e+06	98	1.11667e+07	6.23173e+06	1.17864e+06	4.9917e+06	157	1.45318e+07	8.35592e+06	3.03416e+06	2.9605e+06
Brain 3	Slice 1	143	1.92361e+07	8.80661e+06	3.43109e+06	9.17668e+06	137	3.86433e+07	2.62533e+07	3.65701e+06	1.1879e+07	97	1.70454e+07	1.05995e+07	1.38026e+06	4.18112e+06
	Slice 2	150	5.11468e+07	2.49557e+07	1.07901e+07	2.18953e+07	151	3.10778e+07	2.2022e+07	2.40395e+06	6.61438e+06	114	1.37734e+07	8.53412e+06	2.06308e+06	3.93443e+06
Brain 4	Slice 1	231	5.99419e+07	3.6872e+07	1.36502e+07	6.63422e+06	300	2.11995e+07	1.23206e+07	3.96906e+06	6.76285e+06	273	5.21462e+07	3.98819e+07	7.65165e+06	3.33266e+06
	Slice 2	232	8.37632e+07	5.59266e+07	1.90363e+07	7.99746e+06	240	1.69868e+07	9.10468e+06	1.83707e+06	7.7681e+06	343	4.27645e+07	2.90793e+07	6.02444e+06	8.20214e+06
