# Supplementary material for: Role of Nrp1 in controlling cortical inter-hemispheric circuits
Source: eLife. 2022 Mar 1;11:e69776. doi: 10.7554/eLife.69776 (PMC8887897; doi:10.7554/eLife.69776)
Supplement: Figure 4—figure supplement 3—source data 1. [file elife-69776-fig4-figsupp3-data1.xlsx]

## Sheet: Fig. 4 Sup. 3
B	% L2/3 GFP+ at P16							C	% L2/3 GFP+ at P30
	S1			S2					S1			S2
	Control	shNrp1	CAG Nrp1	Control	shNrp1	CAG Nrp1			Control	shNrp1	CAG Nrp1	Control	shNrp1	CAG Nrp1
Data 1	70.2006	61.6637	81.7054	29.7994	38.3363	18.2946		Data 1	36	31.875	72.1477	64	68.125	27.8523
Data 2	55.2632	70.4846	79.716	44.7368	29.5154	20.284		Data 2	53.6885	50.2222	76.5766	46.3115	49.7778	23.4234
Data 3	75.8442	67.7083	80.5687	24.1558	32.2917	19.4313		Data 3	80.8383	58.9091	49.8182	19.1617	41.0909	50.1818
Data 4	18.6047	69.4444	67.5325	81.3953	30.5556	32.4675		Data 4	49.0153	31.25	35.3604	50.9847	68.75	64.6396
Data 5		69.2833	54.5455		30.7167	45.4545		Data 5	53.7313		31.9648	46.2687		68.0352
Data 6			37.6081			62.3919
H	Midline CC (P16)																	L	Midline CC (P30)
	Distance (RU)	Bins																	Distance (RU)	Bins
		Control				shNrp1					CAG Nrp1									Control					shNrp1				CAG Nrp1
		Data 1	Data 2	Data 3	Data 4	Data 1	Data 2	Data 3	Data 4	Data 5	Data 1	Data 2	Data 3	Data 4	Data 5	Data 6				Data 1	Data 2	Data 3	Data 4	Data 5	Data 1	Data 2	Data 3	Data 4	Data 1	Data 2	Data 3	Data 4	Data 5
	0	0.0677461	0.373255	0.364408	0.0656837	0.626767	0.225344	0.0840093	0.410904	0.297838	0.229592	0.123258	0.567318	0.1549	0.0837394	0.151681			0	0.206489	0.211117	0.204068	0.191163	0.112433	0.241048	0.373739	0.200419	0.362116	0.381222	0.184169	0.113857	0.217706	0.0912938
	0.119033	0.126537	0.381894	0.367925	0.0604443	0.640017	0.244121	0.0931853	0.448168	0.295566	0.221226	0.156025	0.589804	0.165199	0.0802811	0.147739			0.119033	0.191831	0.196812	0.225908	0.1949	0.107732	0.380109	0.364963	0.266447	0.357211	0.403377	0.264917	0.124324	0.261747	0.0922932
	0.238065	0.082751	0.393302	0.404559	0.0576475	0.617507	0.250701	0.106202	0.44677	0.323883	0.335454	0.172959	0.587635	0.175837	0.117561	0.156379			0.238065	0.248249	0.212775	0.219243	0.19689	0.107684	0.420273	0.367491	0.227704	0.33855	0.45018	0.241367	0.112926	0.257104	0.0940029
	0.357176	0.0865356	0.387411	0.3866	0.0861508	0.612637	0.277137	0.10108	0.462887	0.326249	0.367087	0.215047	0.562573	0.159584	0.128276	0.1476			0.357176	0.285241	0.19747	0.25073	0.219972	0.107472	0.412541	0.355687	0.284159	0.359944	0.395081	0.21966	0.122663	0.213863	0.0952637
	0.476209	0.101099	0.404729	0.351942	0.0595679	0.610059	0.271059	0.132367	0.439864	0.337931	0.374282	0.292401	0.548706	0.160858	0.185854	0.140427			0.476209	0.209684	0.229347	0.290341	0.181062	0.113535	0.323617	0.37511	0.215143	0.364814	0.509501	0.233201	0.199778	0.234315	0.0964346
	0.595242	0.117301	0.442389	0.398475	0.0636706	0.664198	0.344818	0.135165	0.465843	0.354871	0.501512	0.375027	0.539111	0.155334	0.163499	0.239401			0.595242	0.222551	0.243592	0.272912	0.197776	0.108626	0.301845	0.367068	0.223203	0.360525	0.614935	0.300409	0.189038	0.26041	0.109856
	0.714275	0.118936	0.435852	0.33606	0.0732728	0.696257	0.321351	0.204334	0.506445	0.38643	0.481396	0.365058	0.54996	0.165023	0.170091	0.19057			0.714275	0.211056	0.276574	0.387166	0.196882	0.112047	0.390369	0.357124	0.252538	0.371773	0.565068	0.250653	0.201906	0.241066	0.113998
	0.833307	0.143869	0.437673	0.356096	0.0913456	0.654125	0.513011	0.257843	0.471312	0.356794	0.662199	0.368114	0.540511	0.190594	0.236977	0.216505			0.833307	0.269884	0.336108	0.49872	0.205679	0.125863	0.5341	0.35252	0.292587	0.385891	0.573291	0.287974	0.303452	0.331084	0.144797
	0.952418	0.245711	0.466052	0.34365	0.10712	0.577811	0.398323	0.294819	0.551956	0.335065	0.434082	0.409623	0.562964	0.216315	0.239997	0.23452			0.952418	0.313863	0.384003	0.56797	0.18666	0.135758	0.665509	0.356816	0.427263	0.3504	0.747776	0.389582	0.238555	0.284308	0.181411
	1.07145	0.171213	0.552424	0.429973	0.0871552	0.663419	0.443098	0.337408	0.594241	0.367412	0.452034	0.366713	0.522113	0.197665	0.258151	0.229904			1.07145	0.282472	0.50694	0.49932	0.187252	0.151799	0.565015	0.350248	0.306315	0.371152	0.796271	0.406377	0.250253	0.411085	0.202275
	1.19048	0.235602	0.556012	0.658204	0.146556	0.670662	0.413776	0.433597	0.515375	0.39954	0.422901	0.47316	0.555246	0.223988	0.251942	0.366661			1.19048	0.34363	0.60798	0.45763	0.201237	0.167165	0.517677	0.358076	0.437797	0.378029	0.952517	0.434513	0.259785	0.40693	0.188446
	1.30952	0.192845	0.617708	0.723324	0.33406	0.611612	0.349462	0.402876	0.559991	0.388978	0.508777	0.536145	0.537493	0.212991	0.266572	0.309951			1.30952	0.362496	0.456854	0.567179	0.242251	0.195268	0.832455	0.320305	0.419277	0.402214	0.885814	0.470217	0.336628	0.648086	0.261906
	1.42855	0.246172	0.605094	0.555231	0.314602	0.676123	0.369969	0.492769	0.639866	0.393964	0.465281	0.574475	0.556761	0.241259	0.30991	0.366308			1.42855	0.316718	0.617267	0.512181	0.223309	0.219106	0.786375	0.320355	0.388593	0.336551	0.744052	0.72548	0.374141	0.761945	0.229029
	1.54758	0.237952	0.628568	0.53911	0.394139	0.655422	0.371524	0.483538	0.559885	0.394048	0.45238	0.726361	0.553984	0.247413	0.415132	0.419451			1.54758	0.287492	0.506569	0.58408	0.19443	0.199986	0.635868	0.325587	0.426349	0.389239	0.721546	0.663786	0.522952	0.578712	0.228378
	1.66669	0.23146	0.611231	0.403773	0.435718	0.668816	0.429661	0.619869	0.685351	0.402546	0.456952	0.746804	0.551547	0.260006	0.492778	0.310748			1.66669	0.315553	0.436384	0.697842	0.236743	0.180092	0.579815	0.365435	0.569766	0.418224	0.643057	0.633152	0.536047	0.548433	0.272175
	1.78573	0.371325	0.608672	0.499834	0.435276	0.699903	0.422543	0.580383	0.715789	0.446785	0.57728	0.6942	0.55802	0.364477	0.446359	0.313702			1.78573	0.32385	0.485494	0.67734	0.243688	0.212058	0.733576	0.37903	0.569535	0.376451	0.760566	0.608002	0.529633	0.507054	0.277208
	1.90476	0.471215	0.631177	0.525156	0.507298	0.716762	0.482513	0.479279	0.758009	0.469764	0.79913	0.750882	0.55717	0.354549	0.34815	0.355175			1.90476	0.347669	0.558304	0.6069	0.325014	0.28699	0.835383	0.361584	0.571378	0.385433	0.790591	0.632108	0.517823	0.563622	0.297348
	2.02379	0.469251	0.663256	0.721392	0.630073	0.674382	0.605034	0.604729	0.71712	0.529396	0.602918	0.69644	0.505943	0.389312	0.464694	0.531496			2.02379	0.474606	0.655702	0.580588	0.315587	0.320815	0.924632	0.354785	0.530446	0.412545	0.797663	0.743372	0.526078	0.486485	0.330731
	2.14282	0.52716	0.775723	0.525591	0.51711	0.731728	0.645399	0.791222	0.64721	0.555679	0.630272	0.699183	0.515501	0.343262	0.485004	0.453664			2.14282	0.495028	0.839431	0.499076	0.349905	0.394516	0.839005	0.386481	0.512536	0.400982	0.801736	0.56492	0.603536	0.420311	0.378219
	2.26193	0.553958	0.76681	0.652035	0.586991	0.692165	0.757138	0.810296	0.709514	0.589156	0.672429	0.637765	0.545537	0.452475	0.545466	0.565578			2.26193	0.600385	0.726722	0.518826	0.432256	0.479946	0.837408	0.460029	0.511892	0.436215	0.722323	0.572713	0.723966	0.547518	0.395359
	2.38097	0.662203	0.686182	0.578991	0.549685	0.628429	0.782246	0.831251	0.768303	0.650075	0.71899	0.701937	0.679517	0.489844	0.56463	0.574001			2.38097	0.628807	0.630343	0.542333	0.543166	0.776426	0.819882	0.463687	0.604391	0.44976	0.761375	0.562839	0.703115	0.587862	0.483751
	2.5	0.637643	0.707686	0.67707	0.521336	0.643406	0.83276	0.729653	0.812261	0.676702	0.651378	0.68729	0.680556	0.578782	0.651649	0.449875			2.5	0.804382	0.563055	0.650672	0.498727	0.882031	0.684017	0.53354	0.627474	0.435826	0.630828	0.613583	0.570755	0.702856	0.448444
	2.61903	0.684553	0.825025	0.80838	0.530278	0.698841	0.856687	0.797577	0.779426	0.814079	0.665723	0.645854	0.675413	0.539201	0.539385	0.4559			2.61903	0.634168	0.498552	0.861811	0.493468	0.987431	0.742112	0.550863	0.836532	0.533054	0.613443	0.679753	0.731759	0.588459	0.505645
	2.73807	0.779841	0.770229	0.739738	0.641963	0.649198	0.729097	0.882915	0.78239	0.808061	0.591901	0.681115	0.596384	0.541043	0.589345	0.573073			2.73807	0.622669	0.587144	0.862482	0.624296	0.903006	0.785562	0.562861	0.849027	0.568509	0.574317	0.799236	0.693482	0.542423	0.701759
	2.85718	0.89266	0.860975	0.798703	0.6175	0.717483	0.638941	0.779107	0.811711	0.898929	0.663943	0.669825	0.638413	0.581328	0.710539	0.490461			2.85718	0.672554	0.459164	0.724814	0.432261	0.777376	0.700886	0.677833	0.767275	0.573087	0.609545	0.694332	0.663705	0.490822	0.616066
	2.97621	0.898554	0.860798	0.718763	0.712438	0.721732	0.840106	0.821829	0.803258	0.928522	0.719352	0.793142	0.616628	0.596095	0.599908	0.466366			2.97621	0.660632	0.587659	0.734057	0.510602	0.665272	0.686505	0.679963	0.785099	0.498613	0.653359	0.740479	0.74888	0.732383	0.594459
	3.09524	0.887144	0.916275	0.704936	0.680948	0.77556	0.810199	0.624259	0.787693	0.658185	0.81751	0.777783	0.615746	0.638616	0.70518	0.584458			3.09524	0.664953	0.663035	0.759016	0.487288	0.550002	0.669502	0.765501	0.756018	0.678355	0.572128	0.694046	0.631653	0.692926	0.512933
	3.21427	0.865914	0.85116	0.700389	0.644418	0.781697	0.619412	0.580761	0.847839	0.718895	0.752805	0.862603	0.658654	0.608264	0.760264	0.436243			3.21427	0.693934	0.662925	0.649898	0.517896	0.594534	0.731259	1	0.770764	0.673377	0.61027	0.731907	0.634745	0.776251	0.612338
	3.33331	0.820023	0.7931	0.603032	0.594245	0.781949	0.69616	0.440893	0.721073	0.735875	0.712329	0.911021	0.660137	0.66842	0.764767	0.463703			3.33331	0.592143	0.758491	0.67484	0.438461	0.5203	0.740031	0.78913	0.61535	0.792259	0.511422	0.754175	0.430273	0.670944	0.627133
	3.45234	0.766444	0.866074	0.755333	0.637457	0.784482	0.660061	0.442475	0.870948	0.777975	0.72314	0.907896	0.602804	0.737145	0.665867	0.435266			3.45234	0.717157	0.651585	0.716701	0.406726	0.4624	0.578113	0.765006	0.590216	0.701997	0.624057	0.921314	0.527381	0.736016	0.620647
	3.57145	0.731746	0.89278	0.69701	0.664737	0.77444	0.725334	0.424408	0.73796	0.790091	0.607313	0.876375	0.570506	0.786791	0.796269	0.469224			3.57145	0.733997	0.634181	0.769014	0.515196	0.430078	0.685603	0.625327	0.590546	0.809079	0.679536	0.886229	0.473611	0.747298	0.76242
	3.69048	0.715449	0.760587	0.881864	0.589633	0.790695	0.777458	0.413191	0.808818	0.767465	0.637597	0.872048	0.699213	0.7495	0.86354	0.448114			3.69048	0.586684	0.584997	0.715104	0.58578	0.417706	0.548001	0.59877	0.604771	0.757403	0.659514	0.771923	0.405794	0.65573	0.63446
	3.80952	0.598691	0.767765	0.80582	0.714188	0.814262	0.676364	0.536084	0.937193	0.746405	0.604495	0.881122	0.691519	0.674609	0.898115	0.385819			3.80952	0.59621	0.536045	0.668676	0.499488	0.301788	0.50672	0.481121	0.649276	0.796064	0.779851	0.763988	0.413686	0.682727	0.683711
	3.92855	0.586015	0.733103	0.824139	0.689087	0.7874	0.729518	0.543347	0.885628	0.789719	0.627914	0.805526	0.671364	0.677676	0.754141	0.426351			3.92855	0.516885	0.64732	0.596933	0.499684	0.436961	0.511944	0.428697	0.633173	0.821862	0.691776	0.824495	0.381966	0.585196	0.732236
	4.04758	0.654467	0.810213	0.730468	0.6135	0.668693	0.686329	0.46616	0.88688	0.677394	0.71027	0.72501	0.838669	0.776833	0.850134	0.50781			4.04758	0.577684	0.500072	0.594179	0.578052	0.509787	0.524027	0.39669	0.559237	0.83342	0.583264	0.758755	0.277189	0.49472	0.703572
	4.16669	0.783948	0.928074	0.527703	0.824013	0.668505	0.766149	0.289903	0.818578	0.649396	0.631977	0.675182	0.751477	0.818247	0.582497	0.507428			4.16669	0.707371	0.449033	0.502618	0.528725	0.527723	0.520889	0.415202	0.552566	0.850048	0.556882	0.723001	0.29087	0.452504	0.757285
	4.28573	0.756797	0.88525	0.520911	0.796117	0.651954	0.794449	0.307516	0.901082	0.571661	0.582521	0.60527	0.802321	0.840588	0.650325	0.412551			4.28573	0.611209	0.415634	0.452945	0.411433	0.636431	0.514846	0.394259	0.582285	0.848015	0.578247	0.668595	0.251647	0.470272	0.722996
	4.40476	0.632907	0.867693	0.589961	0.740874	0.648745	0.759059	0.306641	0.904632	0.585854	0.676627	0.549639	0.836949	0.830691	0.70548	0.557883			4.40476	0.666697	0.348288	0.581622	0.438318	0.671772	0.399328	0.378501	0.655681	0.900133	0.499728	0.769088	0.259239	0.448351	0.676014
	4.52379	0.722683	0.837577	0.544746	0.695672	0.637196	0.848731	0.297897	0.828912	0.564564	0.607229	0.536333	0.821415	0.87881	0.801591	0.614147			4.52379	0.631834	0.390111	0.584226	0.3941	0.675499	0.488883	0.365175	0.596758	0.859089	0.560635	0.673114	0.237739	0.448368	0.637329
	4.64282	0.644829	0.848907	0.434585	0.67604	0.684069	0.860048	0.238662	0.893013	0.555814	0.604079	0.576653	0.945426	0.917442	0.744986	0.605408			4.64282	0.553817	0.445343	0.648392	0.334007	0.655404	0.466766	0.387295	0.548864	0.83894	0.547235	0.722955	0.315538	0.428407	0.757315
	4.76194	0.565427	0.79855	0.408971	0.576798	0.574856	0.809259	0.263999	0.890572	0.519169	0.63142	0.507238	0.909747	0.967844	0.743467	0.732992			4.76194	0.561771	0.428453	0.678976	0.232071	0.436507	0.493306	0.377581	0.460287	0.860641	0.516122	0.672744	0.268167	0.453402	0.792232
	4.88097	0.460996	0.757851	0.417636	0.742952	0.599112	0.701936	0.20474	0.727745	0.486604	0.60769	0.483667	0.742705	0.923021	0.643754	0.598692			4.88097	0.473782	0.397529	0.57902	0.23407	0.481244	0.517249	0.349112	0.679148	0.652747	0.527699	0.623086	0.264613	0.363052	0.773766
	5	0.371124	0.771433	0.347401	0.569207	0.570267	0.742539	0.208712	0.725476	0.433578	0.745856	0.43735	0.75383	0.824744	0.615248	0.620482			5	0.401393	0.421879	0.478739	0.202463	0.614709	0.640642	0.356632	0.648767	0.673889	0.550462	0.658584	0.192957	0.383159	0.768295
	5.11903	0.311968	0.673973	0.336651	0.484236	0.534761	0.715199	0.198643	0.714089	0.426545	0.54816	0.431268	0.632626	0.803809	0.582813	0.59149			5.11903	0.487479	0.412905	0.486917	0.179514	0.413122	0.614171	0.348608	0.573711	0.710242	0.503866	0.605451	0.165927	0.407767	0.80637
	5.23806	0.320838	0.799107	0.289885	0.540697	0.618294	0.639252	0.193983	0.695128	0.397549	0.581723	0.423774	0.683795	0.85436	0.642651	0.623527			5.23806	0.481733	0.460219	0.432261	0.209164	0.236068	0.553627	0.356869	0.584083	0.66985	0.422528	0.540161	0.195681	0.34515	0.917552
	5.3571	0.326522	0.746165	0.329605	0.5919	0.485929	0.700791	0.364168	0.586978	0.418799	0.727117	0.32415	0.533154	0.756885	0.620585	0.668592			5.3571	0.436974	0.444875	0.39072	0.143553	0.223854	0.464935	0.326715	0.610761	0.661829	0.422052	0.567099	0.182647	0.251677	0.911218
	5.47621	0.504215	0.759608	0.390844	0.487586	0.61007	0.626415	0.566783	0.54111	0.402429	0.590488	0.423099	0.575937	0.64777	0.53196	0.711498			5.47621	0.377898	0.368342	0.351205	0.131486	0.204578	0.458818	0.365179	0.52124	0.583903	0.46359	0.672226	0.235134	0.264189	0.755411
	5.59524	0.649888	0.553514	0.361297	0.524163	0.636479	0.633904	0.575335	0.491724	0.376865	0.623484	0.39239	0.603589	0.568154	0.468555	0.7838			5.59524	0.314358	0.373076	0.263766	0.159449	0.206896	0.487169	0.362051	0.580282	0.613905	0.500838	0.698401	0.170364	0.205226	0.680663
	5.71427	0.8541	0.614367	0.31489	0.407573	0.656993	0.590671	0.604808	0.550927	0.335491	0.622044	0.436836	0.527274	0.524754	0.44118	0.884066			5.71427	0.393835	0.300455	0.306851	0.155732	0.286052	0.561017	0.337517	0.523879	0.526885	0.450558	0.573978	0.136918	0.229567	0.530775
	5.83331	0.837828	0.582123	0.265852	0.304069	0.691868	0.525267	0.644249	0.44946	0.314051	0.528037	0.394591	0.485393	0.614028	0.398207	0.807428			5.83331	0.461247	0.295445	0.319127	0.153321	0.263522	0.37852	0.326217	0.522891	0.501145	0.376466	0.480099	0.130316	0.228093	0.291905
	5.95234	0.9561	0.593982	0.224092	0.360725	0.656881	0.575666	0.429068	0.428279	0.309101	0.649594	0.440211	0.513925	0.503581	0.449713	0.784357			5.95234	0.476108	0.329002	0.390551	0.250557	0.279642	0.411095	0.390452	0.548097	0.490558	0.415782	0.416703	0.146567	0.233567	0.345416
	6.07145	0.746384	0.463613	0.271664	0.30319	0.614327	0.559962	0.304375	0.451151	0.30005	0.61404	0.348633	0.513945	0.380086	0.416311	0.760339			6.07145	0.570307	0.340892	0.290487	0.373986	0.207619	0.338681	0.410467	0.553634	0.412662	0.461451	0.461956	0.152258	0.221902	0.231972
	6.19048	0.702058	0.434022	0.264832	0.236798	0.514383	0.437022	0.189305	0.394785	0.287047	0.538691	0.33624	0.453284	0.314226	0.387624	0.65658			6.19048	0.419688	0.312894	0.208977	0.540068	0.153776	0.33673	0.350478	0.534774	0.444227	0.463838	0.372002	0.156132	0.207175	0.196511
	6.30952	0.484819	0.43438	0.276306	0.311531	0.537879	0.544456	0.121137	0.375255	0.269367	0.624938	0.31159	0.460814	0.328881	0.359711	0.784311			6.30952	0.367775	0.292774	0.158494	0.497123	0.141099	0.296727	0.319356	0.506459	0.359427	0.410761	0.405863	0.130043	0.227953	0.186757
	6.42855	0.371719	0.408349	0.283544	0.315973	0.491926	0.471111	0.114183	0.398939	0.269755	0.502158	0.357332	0.444423	0.290078	0.294648	0.707546			6.42855	0.373945	0.28736	0.1498	0.392802	0.14121	0.325959	0.314501	0.395723	0.378778	0.377486	0.311725	0.145735	0.259948	0.175802
	6.54758	0.430467	0.443791	0.246505	0.269506	0.470344	0.460773	0.116392	0.404872	0.275308	0.491367	0.373055	0.582287	0.309916	0.23846	0.695472			6.54758	0.273071	0.241095	0.152775	0.441024	0.141492	0.298665	0.330053	0.391477	0.327779	0.300904	0.277071	0.155031	0.204775	0.204819
	6.66669	0.389461	0.422181	0.265956	0.26367	0.389663	0.534582	0.120543	0.397919	0.278262	0.498536	0.386358	0.529256	0.2446	0.204507	0.723242			6.66669	0.278784	0.265706	0.152855	0.341866	0.168343	0.258015	0.294628	0.316478	0.322982	0.311514	0.308603	0.125238	0.225116	0.176082
	6.78573	0.456545	0.413731	0.208443	0.228097	0.393651	0.450719	0.118728	0.435167	0.288571	0.417482	0.401601	0.54841	0.283538	0.209354	0.644942			6.78573	0.226899	0.257525	0.168815	0.290726	0.164127	0.267514	0.292515	0.291052	0.358961	0.268518	0.266772	0.129465	0.201074	0.150221
	6.90476	0.337175	0.403235	0.208211	0.214956	0.349944	0.525936	0.105193	0.443576	0.269435	0.415124	0.396939	0.530929	0.310458	0.156212	0.570518			6.90476	0.205918	0.258786	0.159726	0.281205	0.138416	0.388177	0.274206	0.307568	0.3123	0.35092	0.251758	0.144472	0.178676	0.175679
	7.02379	0.313687	0.345529	0.221184	0.169853	0.371404	0.537572	0.11821	0.411557	0.276216	0.515999	0.340606	0.458991	0.240965	0.161311	0.569755			7.02379	0.209564	0.23481	0.14077	0.181212	0.15809	0.358295	0.28289	0.354837	0.355843	0.360921	0.269085	0.14546	0.20269	0.142739
	7.14282	0.338439	0.369686	0.240311	0.166915	0.363016	0.487825	0.115267	0.380242	0.276442	0.460592	0.400547	0.499017	0.204163	0.139854	0.446776			7.14282	0.226248	0.228015	0.143236	0.183726	0.16876	0.364879	0.274042	0.347206	0.359744	0.392302	0.273931	0.123704	0.193302	0.141884
	7.26186	0.361638	0.330588	0.245891	0.199622	0.342569	0.489571	0.153519	0.386061	0.267797	0.471253	0.393353	0.513821	0.201448	0.140683	0.286195			7.26186	0.197462	0.242896	0.149521	0.206172	0.164037	0.264622	0.297847	0.281191	0.358605	0.308007	0.359146	0.128418	0.197742	0.130075
	7.38097	0.425307	0.325499	0.289184	0.15337	0.332496	0.485297	0.161623	0.410958	0.287062	0.465037	0.365254	0.466252	0.176838	0.116082	0.366942			7.38097	0.161891	0.239633	0.149113	0.195959	0.156064	0.329123	0.279938	0.244825	0.307591	0.286266	0.227686	0.123693	0.212227	0.125675
	7.5	0.361927	0.315679	0.255022	0.108	0.331392	0.393523	0.101778	0.380601	0.269857	0.478481	0.284317	0.500964	0.170187	0.140826	0.340225			7.5	0.213811	0.23838	0.146978	0.164813	0.184008	0.281472	0.296658	0.379781	0.319467	0.38532	0.217472	0.143476	0.180377	0.140266
	7.61903	0.278587	0.331968	0.207421	0.116386	0.314419	0.352879	0.0853738	0.329194	0.289889	0.374535	0.318603	0.5252	0.177198	0.115339	0.355529			7.61903	0.181212	0.202224	0.146708	0.187294	0.200544	0.329297	0.284927	0.331749	0.32699	0.437761	0.194201	0.13738	0.188548	0.155082
	7.73806	0.275327	0.303608	0.216926	0.0864172	0.311926	0.493095	0.104204	0.327572	0.273795	0.382666	0.301728	0.459589	0.169411	0.137477	0.298899			7.73806	0.172353	0.219995	0.143131	0.235468	0.20965	0.260589	0.283776	0.435774	0.326552	0.467536	0.21745	0.127224	0.182143	0.117322
	7.8571	0.168302	0.325283	0.187164	0.075375	0.311482	0.447911	0.0874266	0.319422	0.290234	0.391889	0.238438	0.429053	0.174529	0.109412	0.217747			7.8571	0.133852	0.214167	0.151162	0.185194	0.220413	0.260865	0.272369	0.498378	0.320124	0.427085	0.197368	0.143528	0.188127	0.115465
	7.97621	0.152749	0.295204	0.161781	0.0598461	0.327403	0.380643	0.0840433	0.314522	0.307805	0.46214	0.224473	0.408407	0.186345	0.116916	0.168739			7.97621	0.168158	0.203395	0.147454	0.208384	0.224122	0.274099	0.281778	0.371892	0.341667	0.378937	0.211692	0.12025	0.177975	0.119996
	8.09524	0.210303	0.281034	0.166862	0.077166	0.350297	0.302268	0.0890741	0.35548	0.288914	0.443225	0.173214	0.433821	0.180276	0.117	0.117931			8.09524	0.146099	0.204431	0.14666	0.191726	0.214472	0.244835	0.265021	0.252686	0.348918	0.29608	0.190543	0.116523	0.184287	0.144727
	8.21428	0.11577	0.293976	0.164314	0.0484449	0.302882	0.282151	0.101205	0.322005	0.316072	0.434903	0.192307	0.507181	0.16982	0.14116	0.130732			8.21428	0.140537	0.206842	0.140367	0.236581	0.219547	0.253234	0.278007	0.205502	0.342649	0.232167	0.187271	0.112178	0.180762	0.148906
	8.33331	0.105581	0.288156	0.171066	0.0440462	0.30529	0.225445	0.103723	0.3253	0.297508	0.460253	0.170247	0.444359	0.171907	0.145329	0.125104			8.33331	0.115175	0.209542	0.136436	0.161206	0.245975	0.241183	0.26973	0.18915	0.319796	0.25174	0.193425	0.111144	0.170342	0.14441
	8.45234	0.116117	0.293037	0.13285	0.0525466	0.362395	0.202291	0.0953273	0.334462	0.29767	0.37424	0.122719	0.407459	0.175224	0.140899	0.108364			8.45234	0.118308	0.196139	0.13552	0.145503	0.237426	0.236101	0.296271	0.181156	0.30188	0.284792	0.210638	0.103509	0.17212	0.176311
	8.57145	0.163145	0.306961	0.131166	0.0563302	0.333919	0.211426	0.106132	0.342885	0.30511	0.460994	0.139276	0.387294	0.175086	0.154755	0.125326			8.57145	0.11951	0.206811	0.143568	0.143773	0.217239	0.236327	0.305609	0.164222	0.35248	0.368359	0.251054	0.11378	0.172755	0.131209
	8.69048	0.0904985	0.304617	0.143438	0.0465371	0.326585	0.204487	0.0804206	0.350273	0.312197	0.453289	0.142694	0.432453	0.158629	0.106208	0.122812			8.69048	0.125555	0.201359	0.146558	0.145436	0.203868	0.2192	0.324893	0.151843	0.343497	0.419509	0.270082	0.107339	0.171068	0.118696
	8.80952	0.0844709	0.334694	0.148191	0.0448104	0.308893	0.198974	0.0803094	0.35132	0.319127	0.445819	0.136848	0.431607	0.150523	0.115363	0.102331			8.80952	0.148753	0.198379	0.156438	0.149336	0.212202	0.176528	0.342722	0.168063	0.323143	0.344156	0.200845	0.111474	0.168995	0.14209
	8.92855	0.165481	0.331979	0.147076	0.0435	0.351429	0.19768	0.0809952	0.343966	0.309758	0.332139	0.133386	0.340153	0.16082	0.125986	0.113939			8.92855	0.161993	0.197328	0.151205	0.136334	0.231751	0.193074	0.367457	0.210693	0.335724	0.443289	0.211226	0.105205	0.163014	0.150241
	9.04758	0.0598358	0.347833	0.18634	0.042236	0.293651	0.184396	0.0795511	0.352264	0.313408	0.302387	0.126115	0.37543	0.179821	0.135101	0.134602			9.04758	0.175197	0.201572	0.145465	0.125194	0.225936	0.205486	0.397284	0.147329	0.337004	0.461185	0.185183	0.0893545	0.160364	0.126885
	9.16669	0.0578528	0.393945	0.201163	0.0358379	0.324413	0.184843	0.0781717	0.427496	0.310764	0.300883	0.103315	0.356139	0.183023	0.149099	0.112331			9.16669	0.121038	0.203954	0.155005	0.112884	0.214197	0.256019	0.417237	0.167806	0.331812	0.397247	0.206243	0.106218	0.163996	0.118807
	9.28572	0.0491295	0.353238	0.193005	0.046899	0.2675	0.174119	0.0810439	0.370026	0.338311	0.353538	0.107381	0.342771	0.191859	0.105139	0.127113			9.28572	0.114158	0.204992	0.154414	0.115188	0.202613	0.247813	0.415826	0.151574	0.277276	0.326974	0.185067	0.0929071	0.161177	0.123578
	9.40476	0.0483174	0.363758	0.201773	0.0472415	0.263006	0.183888	0.0776049	0.418414	0.326186	0.35538	0.10634	0.408091	0.223794	0.100117	0.111005			9.40476	0.116541	0.201385	0.145244	0.13741	0.219478	0.230552	0.470207	0.128429	0.295718	0.311584	0.182061	0.0886272	0.170931	0.123525
	9.52379	0.0437734	0.371652	0.229502	0.059843	0.23794	0.174654	0.0753597	0.381053	0.335457	0.363784	0.105043	0.452346	0.19989	0.124659	0.107636			9.52379	0.130301	0.207816	0.15273	0.15713	0.228497	0.217548	0.525067	0.139293	0.298248	0.358588	0.209103	0.0968852	0.164838	0.129074
	9.64282	0.0389127	0.411365	0.230641	0.0411234	0.230505	0.1844	0.0787591	0.415454	0.348	0.291021	0.10185	0.376916	0.17438	0.111081	0.0951039			9.64282	0.129229	0.211275	0.16177	0.149553	0.221341	0.236743	0.527225	0.147842	0.301335	0.462177	0.201223	0.101097	0.167516	0.128126
	9.76186	0.034456	0.409583	0.228571	0.0332909	0.21938	0.190327	0.0820585	0.417545	0.331184	0.255511	0.103132	0.335501	0.15604	0.13319	0.086394			9.76186	0.130429	0.212171	0.146825	0.128708	0.230223	0.271738	0.477648	0.139068	0.295386	0.463712	0.20015	0.0856614	0.158579	0.125102
	9.88097	0.0440829	0.416058	0.194787	0.0255409	0.223868	0.184846	0.0864717	0.405298	0.324755	0.316473	0.103866	0.395853	0.163773	0.126553	0.0829359			9.88097	0.109668	0.21458	0.157908	0.127796	0.237039	0.254733	0.48352	0.157348	0.303194	0.463541	0.158464	0.110981	0.159916	0.128072
	10	0.0342851	0.515819	0.216629	0.0510015	0.222002	0.176233	0.0798216	0.456363	0.328963	0.242482	0.104696	0.440387	0.16433	0.105796	0.0779495			10	0.122311	0.225108	0.163318	0.14373	0.235818	0.222128	0.431333	0.14166	0.328501	0.498759	0.158443	0.0878316	0.156602	0.12434
P16		Control		shNrp1		CAG-Nrp1				P30		Control		shNrp1		CAG-Nrp1
		S1L2/3	S2L2/3	S1L2/3	S2L2/3	S1L2/3	S2L2/3					S1L2/3	S2L2/3	S1L2/3	S2L2/3	S1L2/3	S2L2/3
Brain 1	Slice 1	159	60	179	111	377	39			Brain 1	Slice 1	50	98	65	112	270	27
	Slice 2	86	44	162	101	150	79				Slice 2	40	62	37	106	160	139
Brain 2	Slice 1	42	30	92	37	252	84			Brain 2	Slice 1	204	114	65	43	228	71
	Slice 2	42	38	68	30	141	16				Slice 2	58	112	48	69	112	33
Brain 3	Slice 1	92	61	85	52	75	22			Brain 3	Slice 1	178	46	81	54	99	67
	Slice 2	200	32	110	41	95	19				Slice 2	92	18	81	59	38	71
Brain 4	Slice 1	33	88	237	63	203	70			Brain 4	Slice 1	111	169	26	79	84	155
	Slice 2	15	122	138	102	213	130				Slice 2	113	64	44	75	73	132
Brain 5	Slice 1			235	89	50	24			Brain 5	Slice 1	65	41			48	116
	Slice 2			171	91	70	76				Slice 2	43	52			61	116
Brain 6	Slice 1					151	205
	Slice 2					110	228
