# Supplementary material for: Role of Nrp1 in controlling cortical inter-hemispheric circuits
Source: eLife. 2022 Mar 1;11:e69776. doi: 10.7554/eLife.69776 (PMC8887897; doi:10.7554/eLife.69776)
Supplement: Figure 4—source data 1. [file elife-69776-fig4-data1.xlsx]

## Sheet: Figure 4
H	Contralateral innervation relative to ipsilateral somas											J	S2 column relative to ipsilateral
	P10			P16			P30						P10			P16			P30
	Control	shNrp1	CAG Nrp1	Control	shNrp1	CAG Nrp1	Control	shNrp1	CAG Nrp1				Control	shNrp1	CAG Nrp1	Control	shNrp1	CAG Nrp1	Control	shNrp1	CAG Nrp1
Data 1	0.658647	0.398981	0.646285	1.50333	0.609053	0.405063	0.80961	0.239775	0.364627			Data 1	0.825513	1.28684	0.885065	5.14561	0.889929	0.668002	3.54273	0.613736	0.538866
Data 2	0.868334	0.610315	0.658493	1.7691	0.790743	0.498976	0.527113	0.753328	0.760001			Data 2	0.860871	1.1084	2.26427	4.82651	1.36979	1.32343	2.31384	1.04821	1.24907
Data 3	1.03046	0.911354	0.585398	0.995571	1.0215	0.620892	0.457004	0.791528	0.30523			Data 3	1.23526	1.51547	0.875419	3.7303	1.6571	1.25708	2.02259	3.19284	0.240674
Data 4	1.44256	0.988579		1.29925	0.296147	0.660975	0.749118	0.379135	0.394989			Data 4	1.07835	2.69354		5.48864	0.812134	1.77292	4.63365	1.77035	0.613621
Data 5							0.78627	1.12913	0.426822			Data 5							3.60502	3.721	1.06613
Data 6							1.23056	0.59908	0.485138			Data 6							4.52343	0.936541	1.26519
Data 7							1.68213	0.821438	0.817764			Data 7							3.8367	3.63579	1.29337
Data 8							1.34456	0.912224	1.68269			Data 8							4.17731	1.28579	2.62425
I	S1/S2 column relative to ipsilateral											K	S2 column relative to S1/S2 column
	P10			P16			P30						P10			P16			P30
	Control	shNrp1	CAG Nrp1	Control	shNrp1	CAG Nrp1	Control	shNrp1	CAG Nrp1				Control	shNrp1	CAG Nrp1	Control	shNrp1	CAG Nrp1	Control	shNrp1	CAG Nrp1
Data 1	0.599477	0.388216	0.755597	1.74178	0.765202	0.382405	0.945302	0.284912	0.462618			Data 1	0.127297	0.306092	0.1434	0.277175	0.115868	0.152326	0.34789	0.202622	0.121796
Data 2	0.660743	0.763377	0.662177	1.93003	0.895558	0.527944	0.676253	1.16116	0.888862			Data 2	0.144159	0.144413	0.318745	0.232609	0.158095	0.261574	0.305869	0.0837835	0.140536
Data 3	1.15758	1.11641	0.634422	0.829282	1.22768	0.669862	0.543503	1.00622	0.696975			Data 3	0.120263	0.129947	0.128267	0.410987	0.124229	0.185982	0.323384	0.29308	0.0325176
Data 4	1.5822	0.988979		1.45764	0.287411	0.83987	0.823987	0.440782	0.556027			Data 4	0.0674052	0.254948		0.355292	0.261961	0.199515	0.532004	0.375339	0.102456
Data 5							1.30525	1.3348	0.438124			Data 5							0.261092	0.296647	0.234208
Data 6							1.29394	0.629936	0.958665			Data 6							0.340968	0.139092	0.129334
Data 7							1.92155	0.973957	0.999326			Data 7							0.186678	0.362083	0.119783
Data 8							1.64425	1.28846	2.10563			Data 8							0.23457	0.0951928	0.115121
P10		Control				shNrp1				CAG Nrp1
		N GFP L2/3	Contralateral	S1/S2 column	S2 column	N GFP L2/3	Contralateral	S1/S2 column	S2 column	N GFP L2/3	Contralateral	S1/S2 column	S2 column
Brain 1	Slice 1	221	4.80792e+07	2.237e+07	2.99728e+06	278	2.26892e+07	1.41897e+07	3.03193e+06	232	2.03137e+07	1.26852e+07	2.72506e+06
	Slice 2	217	2.10544e+07	1.37936e+07	1.66361e+06	233	2.53836e+07	1.29716e+07	5.16934e+06	100	2.21115e+07	1.53024e+07	1.10142e+06
Brain 2	Slice 1	156	4.30768e+07	1.93966e+07	1.62588e+06	282	4.09797e+07	2.7137e+07	6.73017e+06	266	3.50693e+07	2.40061e+07	4.36415e+06
	Slice 2	163	2.25907e+07	9.33835e+06	1.90965e+06	274	4.00523e+07	3.1129e+07	1.27066e+06	177	3.23317e+07	1.62439e+07	7.40229e+06
Brain 3	Slice 1	180	6.52165e+07	4.10726e+07	3.00658e+06	129	3.3103e+07	2.48251e+07	2.93724e+06	280	3.46742e+07	2.39827e+07	1.96304e+06
	Slice 2	278	3.60968e+07	2.50255e+07	4.18738e+06	188	3.35883e+07	2.15149e+07	3.04599e+06	201	3.13072e+07	1.78368e+07	3.11575e+06
Brain 4	Slice 1	196	5.56168e+07	3.21236e+07	2.64062e+06	222	4.65033e+07	2.38983e+07	9.67109e+06
	Slice 2	161	6.52416e+07	4.36349e+07	2.29556e+06	190	3.95075e+07	2.58531e+07	2.72024e+06
P16		Control				shNrp1				CAG Nrp1
		N GFP L2/3	Contralateral	S1/S2 column	S2 column	N GFP L2/3	Contralateral	S1/S2 column	S2 column	N GFP L2/3	Contralateral	S1/S2 column	S2 column
Brain 1	Slice 1	219	7.20976e+07	5.28421e+07	9.29385e+06	290	3.98742e+07	3.46093e+07	2.1948e+06	416	3.11782e+07	1.63938e+07	1.77028e+06
	Slice 2	130	5.05432e+07	3.08747e+07	1.16852e+07	263	4.03427e+07	2.39328e+07	4.02836e+06	229	2.71401e+07	1.50473e+07	2.9593e+06
Brain 2	Slice 1	72	3.5264e+07	2.06796e+07	5.1452e+06	129	3.40202e+07	2.35535e+07	2.99257e+06	336	4.89746e+07	3.08787e+07	4.9416e+06
	Slice 2	80	2.84131e+07	1.94653e+07	4.21252e+06	98	1.11667e+07	6.23173e+06	1.17864e+06	157	1.45318e+07	8.35592e+06	3.03416e+06
Brain 3	Slice 1	143	1.92361e+07	8.80661e+06	3.43109e+06	137	3.86433e+07	2.62533e+07	3.65701e+06	97	1.70454e+07	1.05995e+07	1.38026e+06
	Slice 2	150	5.11468e+07	2.49557e+07	1.07901e+07	151	3.10778e+07	2.2022e+07	2.40395e+06	114	1.37734e+07	8.53412e+06	2.06308e+06
Brain 4	Slice 1	231	5.99419e+07	3.6872e+07	1.36502e+07	300	2.11995e+07	1.23206e+07	3.96906e+06	273	5.21462e+07	3.98819e+07	7.65165e+06
	Slice 2	232	8.37632e+07	5.59266e+07	1.90363e+07	240	1.69868e+07	9.10468e+06	1.83707e+06	343	4.27645e+07	2.90793e+07	6.02444e+06
