# Supplementary material for: Role of Nrp1 in controlling cortical inter-hemispheric circuits
Source: eLife. 2022 Mar 1;11:e69776. doi: 10.7554/eLife.69776 (PMC8887897; doi:10.7554/eLife.69776)
Supplement: Figure 5—figure supplement 1—source data 1. [file elife-69776-fig5-figsupp1-data1.xlsx]

## Sheet: Fig. 5 Sup. 1
G	CPNs in S1 at P16							H	CPNs in S2 at P16
	% CTB+ / GFP-			% CTB+ / GFP +					% CTB+ / GFP-			% CTB+ / GFP +
	Control	shNrp1	CAG Nrp1	Control	shNrp1	CAG Nrp1			Control	shNrp1	CAG Nrp1	Control	shNrp1	CAG Nrp1
Data 1	57	51	51	52	55	49		Data 1	41	46	41	41.5	46	40
Data 2	53	59	54	51.5	71	47		Data 2	42	43	37	42	39.5	39
Data 3	56	51.5	46	49	66.5	44		Data 3	38	44	39	42	53	42.5
Data 4	46			53
P16	S1	Control			shNrp1			CAG-Nrp1			P16	S2	Control			shNrp1			CAG-Nrp1
		GFP	CTB	CTB (GFP-)	GFP	CTB	CTB (GFP-)	GFP	CTB	CTB (GFP-)			GFP	CTB	CTB (GFP-)	GFP	CTB	CTB (GFP-)	GFP	CTB	CTB (GFP-)
Brain 1	Slice 1	50	26	28	50	27	20	50	25	25	Brain 1	Slice 1	15	7	20	35	18	22	10	4	19
	Slice 2	50	26	29	50	28	26	50	24	26		Slice 2	25	9	21	25	10	24	25	10	22
Brain 2	Slice 1	19	10	29	50	38	29	50	24	29	Brain 2	Slice 1	18	8	22	10	4	22	20	8	19
	Slice 2	16	8	24	50	33	30	50	23	25		Slice 2	10	4	20	18	7	21	32	12	18
Brain 3	Slice 1	50	27	30	50	32	26	50	22	24	Brain 3	Slice 1	20	21	20	15	8	24	24	9	18
	Slice 2	34	15	26	50	34	25	50	22	22		Slice 2	19	8	18	15	8	20	30	14	21
Brain 4	Slice 1	50	23	22
	Slice 2	50	30	24
