# Supplementary material for: Role of Nrp1 in controlling cortical inter-hemispheric circuits
Source: eLife. 2022 Mar 1;11:e69776. doi: 10.7554/eLife.69776 (PMC8887897; doi:10.7554/eLife.69776)
Supplement: Figure 5—figure supplement 2—source data 1. [file elife-69776-fig5-figsupp2-data1.xlsx]

## Sheet: Fig. 5 Sup. 2
G	CPNs in S1 at P30							H	CPNs in S2 at P30
	% CTB+ / GFP-			% CTB+ / GFP +					% CTB+ / GFP-			% CTB+ / GFP +
	Control	shNrp1	CAG Nrp1	Control	shNrp1	CAG Nrp1			Control	shNrp1	CAG Nrp1	Control	shNrp1	CAG Nrp1
Data 1	52.5	50	50	50	41	48.5		Data 1	35	32	33	36.5	23.3333	25.8333
Data 2	50.5	50	47.5	46	50	38.5		Data 2	34	37	37	36.5	25	32.9167
Data 3	48	50	48	41	49.5	46.5		Data 3	33	37	29	34	20	33.2143
Data 4	43.5	48.5		43.5	40
Data 5	43.5			43.5
P30	S1	Control			shNrp1			CAG-Nrp1			P30	S2	Control			shNrp1			CAG-Nrp1
		GFP	CTB	CTB (GFP-)	GFP	CTB	CTB (GFP-)	GFP	CTB	CTB (GFP-)			GFP	CTB	CTB (GFP-)	GFP	CTB	CTB (GFP-)	GFP	CTB	CTB (GFP-)
Brain 1	Slice 1	45	22	26	50	22	25	50	23	24	Brain 1	Slice 1	40	15	18	30	5	16	30	8	17
	Slice 2	43	22	27	50	19	26	50	26	26		Slice 2	40	14	17	20	6	16	20	5	16
Brain 2	Slice 1	50	24	25	50	26	25	50	23	24	Brain 2	Slice 1	30	11	16	40	12	19	30	10	19
	Slice 2	50	22	26	50	24	25	50	16	23		Slice 2	25	9	18	40	8	18	40	13	18
Brain 3	Slice 1	30	12	25	45	21	25	50	23	23	Brain 3	Slice 1	20	7	17	15	3	19	20	7	15
	Slice 2	40	17	23	50	26	25	50	24	25		Slice 2	15	5	16	10	2	18	35	11	14
Brain 4	Slice 1	50	24	23	50	20	24
	Slice 2	50	20	21	50	20	24
Brain 5	Slice 1	23	10	23
	Slice 2	28	12	20
