# Supplementary material for: Role of Nrp1 in controlling cortical inter-hemispheric circuits
Source: eLife. 2022 Mar 1;11:e69776. doi: 10.7554/eLife.69776 (PMC8887897; doi:10.7554/eLife.69776)
Supplement: Figure 5—source data 1. — Raw data-countings. [file elife-69776-fig5-data1.xlsx]

## Sheet: Figure 5
D	CPNs refinement in S1 (P16-P30)							G	CPNs refinement in S2 (P16-P30)
	P16			P30					P16			P30
	Control	shNrp1	CAG Nrp1	Control	shNrp1	CAG Nrp1			Control	shNrp1	CAG Nrp1	Control	shNrp1	CAG Nrp1
Data 1	52	55	49	50	41	48.5		Data 1	41.5	46	40	36.5	23.3333	25.8333
Data 2	51.5	71	47	46	50	38.5		Data 2	42	39.5	39	36.5	25	32.9167
Data 3	49	66.5	44	41	49.5	46.5		Data 3	42	53	42.5	34	20	33.2143
Data 4	53			43.5	40
Data 5				43.5
P16	S1	Control		shNrp1		CAG-Nrp1				P16	S2	Control		shNrp1		CAG-Nrp1
		GFP	CTB	GFP	CTB	GFP	CTB					GFP	CTB	GFP	CTB	GFP	CTB
Brain 1	Slice 1	50	26	50	27	50	25			Brain 1	Slice 1	15	7	35	18	10	4
	Slice 2	50	26	50	28	50	24				Slice 2	25	9	25	10	25	10
Brain 2	Slice 1	19	10	50	38	50	24			Brain 2	Slice 1	18	8	10	4	20	8
	Slice 2	16	8	50	33	50	23				Slice 2	10	4	18	7	32	12
Brain 3	Slice 1	50	27	50	32	50	22			Brain 3	Slice 1	20	21	15	8	24	9
	Slice 2	34	15	50	34	50	22				Slice 2	19	8	15	8	30	14
Brain 4	Slice 1	50	23
	Slice 2	50	30
P30	S1	Control		shNrp1		CAG-Nrp1				P30	S2	Control		shNrp1		CAG-Nrp1
		GFP	CTB	GFP	CTB	GFP	CTB					GFP	CTB	GFP	CTB	GFP	CTB
Brain 1	Slice 1	45	22	50	22	50	23			Brain 1	Slice 1	40	15	30	5	30	8
	Slice 2	43	22	50	19	50	26				Slice 2	40	14	20	6	20	5
Brain 2	Slice 1	50	24	50	26	50	23			Brain 2	Slice 1	30	11	40	12	30	10
	Slice 2	50	22	50	24	50	16				Slice 2	25	9	40	8	40	13
Brain 3	Slice 1	30	12	45	21	50	23			Brain 3	Slice 1	20	7	15	3	20	7
	Slice 2	40	17	50	26	50	24				Slice 2	15	5	10	2	35	11
Brain 4	Slice 1	50	24	50	20
	Slice 2	50	20	50	20
Brain 5	Slice 1	23	10
	Slice 2	28	12
